# Supplementary material for: Endemic Human Coronavirus-Specific Nasal Immunoglobulin A and Serum Immunoglobulin G Dynamics in Lower Respiratory Tract Infections
Source: MDPI journal article supplement (doi:10.3390/vaccines12010090), 2024-01-17
Supplement: s1 [file s1]

# Endemic Human Coronavirus-Specific Nasal Immunoglobulin A and Serum Immunoglobulin G Dynamics in Lower Respiratory Tract Infections

Ferdiansyah Sechan <sup>1,2</sup>, Katherine Loens <sup>3</sup>, Herman Goossens <sup>3</sup>, Margareta Ieven <sup>3</sup> and Lia van der Hoek <sup>1,2,\*</sup>

<sup>1</sup> Laboratory of Experimental Virology, Department of Medical Microbiology and infection Prevention, Amsterdam University Medical Centers, University of Amsterdam, Meibergdreef 9,

1105 AZ, Amsterdam, The Netherlands; m.f.sechan@amsterdamumc.nl

<sup>2</sup> Amsterdam Institute for Infection and Immunity, 1105 AZ Amsterdam, The Netherlands

<sup>3</sup> Laboratory of Medical Microbiology, Vaccine & Infectious Disease Institute (VAXINFECTIO), University of Antwerp, 2610 Antwerp, Belgium; katherine.loens@uantwerpen.be (K.L.); herman.goossens@uza.be (H.G.); greet.ieven@uza.be (M.I.)

\* Correspondence: c.m.vanderhoek@amsterdamumc.nl

This file includes

- Table S1-S4
- Figure S1-S4

*Table S1: HCoV-matched viral Ct value at enrollment and anti-N-antibody dynamics of the subjects in serum and nasal samples.*

| ID    | HCoV | Virus Ct<br>value at V1 <sup>a</sup> | Serum IgG<br>responder <sup>b</sup> | Fold-change<br>serum anti-N IgG | Serum anti-N IgG, x10 <sup>5</sup> RLU <sup>c</sup> |       | Fold-change<br>nasal anti-N IgA | Nasal anti-N IgA, MFI <sup>d</sup> |         |
|-------|------|--------------------------------------|-------------------------------------|---------------------------------|-----------------------------------------------------|-------|---------------------------------|------------------------------------|---------|
|       |      |                                      |                                     |                                 | V1                                                  | V2    |                                 | V1                                 | V2      |
| OC-01 | OC43 | 15.07                                | 1                                   | 13.24                           | 133.9                                               | 236.4 | 5.64                            | 31.98                              | 180.47  |
| OC-02 | OC43 | 15.66                                | 1                                   | 9.99                            | 14.6                                                | 145.4 | 2.49                            | 39.99                              | 99.75   |
| OC-03 | OC43 | 16.05                                | 1                                   | 2.58                            | 18.6                                                | 48.1  | 0.56                            | 334.76                             | 189.00  |
| OC-04 | OC43 | 16.3                                 | 1                                   | 8.93                            | 13.2                                                | 117.5 | 1.70                            | 193.74                             | 328.70  |
| OC-05 | OC43 | 16.64                                | 0                                   | 1.04                            | 26.2                                                | 27.2  | 0.19                            | 495.16                             | 95.93   |
| OC-06 | OC43 | 18.17                                | 1                                   | 7.07                            | 14.0                                                | 98.7  | 0.43                            | 114.08                             | 49.07   |
| OC-07 | OC43 | 18.46                                | 0                                   | 1.18                            | 12.8                                                | 15.1  | 0.44                            | 204.94                             | 90.42   |
| OC-08 | OC43 | 20.27                                | 1                                   | 9.19                            | 14.7                                                | 135.5 | 1.31                            | 37.24                              | 48.96   |
| OC-09 | OC43 | 20.62                                | 0                                   | 1.30                            | 9.9                                                 | 12.9  | 4.60                            | 96.47                              | 443.81  |
| OC-11 | OC43 | 21.02                                | 0                                   | 1.02                            | 11.4                                                | 11.5  | 1.20                            | 101.13                             | 120.96  |
| OC-12 | OC43 | 21.31                                | 1                                   | 4.71                            | 27.7                                                | 130.6 | 0.54                            | 124.66                             | 67.35   |
| OC-13 | OC43 | 21.51                                | 0                                   | 1.08                            | 14.9                                                | 16.1  | 0.55                            | 162.93                             | 89.96   |
| OC-14 | OC43 | 21.79                                | 1                                   | 6.90                            | 24.0                                                | 165.5 | 0.86                            | 277.44                             | 238.59  |
| HK-01 | HKU1 | NA                                   | 0                                   | 0.66                            | 149.2                                               | 98.3  | 0.18                            | 672.90                             | 118.49  |
| HK-02 | HKU1 | NA                                   | 0                                   | 1.03                            | 78.8                                                | 81.4  | 0.73                            | 210.86                             | 153.32  |
| HK-03 | HKU1 | NA                                   | 1                                   | 2.16                            | 27.7                                                | 59.9  | 1.91                            | 55.99                              | 106.71  |
| HK-04 | HKU1 | NA                                   | 0                                   | 1.05                            | 93.6                                                | 98.6  | 5.15                            | 60.48                              | 311.21  |
| HK-05 | HKU1 | NA                                   | 0                                   | 0.97                            | 72.1                                                | 70.0  | 0.22                            | 166.76                             | 36.47   |
| HK-07 | HKU1 | NA                                   | 0                                   | 0.88                            | 22.0                                                | 19.3  | 0.33                            | 165.70                             | 55.39   |
| HK-08 | HKU1 | NA                                   | 0                                   | 0.87                            | 35.9                                                | 31.3  | 0.75                            | 162.86                             | 122.49  |
| HK-09 | HKU1 | NA                                   | 0                                   | 0.81                            | 50.3                                                | 40.7  | 0.29                            | 249.88                             | 71.25   |
| HK-10 | HKU1 | NA                                   | 1                                   | 1.51                            | 37.0                                                | 55.7  | 0.98                            | 52.48                              | 51.44   |
| HK-11 | HKU1 | NA                                   | 0                                   | 0.61                            | 75.3                                                | 45.8  | 1.35                            | 809.86                             | 1091.87 |
| HK-12 | HKU1 | NA                                   | 1                                   | 1.44                            | 88.6                                                | 127.9 | 1.27                            | 61.98                              | 78.50   |

Table S1 (Continued).

| ID    | HCoV | Virus Ct value at V1 <sup>a</sup> | Serum IgG responder <sup>b</sup> | Fold-change serum anti-N IgG | Serum anti-N IgG, x10 <sup>5</sup> RLU <sup>c</sup> |       | Fold-change nasal anti-N IgA | Nasal anti-N IgA, MFI <sup>d</sup> |         |
|-------|------|-----------------------------------|----------------------------------|------------------------------|-----------------------------------------------------|-------|------------------------------|------------------------------------|---------|
|       |      |                                   |                                  |                              | V1                                                  | V2    |                              | V1                                 | V2      |
| NL-01 | NL63 | 29.62                             | 1                                | 1.51                         | 111.9                                               | 169.0 | 2.80                         | 56.75                              | 158.95  |
| NL-02 | NL63 | 29.6                              | 1                                | 1.41                         | 161.1                                               | 209.7 | 1.01                         | 68.48                              | 69.28   |
| NL-03 | NL63 | 28.01                             | 1                                | 3.30                         | 80.9                                                | 267.1 | 1.31                         | 43.50                              | 56.92   |
| NL-05 | NL63 | 25.27                             | 1                                | 3.24                         | 113.8                                               | 368.6 | 5.50                         | 129.86                             | 714.85  |
| NL-06 | NL63 | 24.25                             | 1                                | 1.82                         | 198.2                                               | 360.0 | 6.20                         | 32.20                              | 199.76  |
| NL-07 | NL63 | 23.9                              | 1                                | 2.38                         | 152.4                                               | 362.2 | 21.11                        | 69.97                              | 1477.38 |
| NL-08 | NL63 | 23.85                             | 1                                | 2.82                         | 95.7                                                | 269.9 | 1.73                         | 35.87                              | 61.99   |
| NL-09 | NL63 | 22.19                             | 1                                | 2.56                         | 126.3                                               | 323.7 | 13.71                        | 46.90                              | 643.13  |
| NL-11 | NL63 | 18.05                             | 1                                | 2.42                         | 91.2                                                | 220.6 | 14.69                        | 192.16                             | 2822.22 |
| TT-01 | 229E | 17.16                             | 1                                | 13.75                        | 18.0                                                | 246.9 | 1.58                         | 35.99                              | 56.96   |
| TT-02 | 229E | 18.84                             | 1                                | 5.26                         | 35.7                                                | 187.5 | 13.64                        | 65.27                              | 890.33  |
| TT-03 | 229E | 19.33                             | 1                                | 1.81                         | 206.5                                               | 290.7 | 54.86                        | 54.74                              | 3003.44 |
| TT-04 | 229E | 20.5                              | 1                                | 12.17                        | 32.2                                                | 391.7 | 5.98                         | 83.57                              | 499.64  |
| TT-05 | 229E | 21.71                             | 1                                | 5.23                         | 60.4                                                | 315.5 | 1.42                         | 55.50                              | 78.97   |
| TT-06 | 229E | 22.52                             | 1                                | 2.68                         | 122.4                                               | 327.5 | 5.19                         | 45.17                              | 234.25  |
| TT-07 | 229E | 23.91                             | 1                                | 5.25                         | 36.0                                                | 189.3 | 1.02                         | 47.91                              | 48.99   |
| TT-09 | 229E | 25.39                             | 1                                | 7.03                         | 33.0                                                | 232.1 | 3.86                         | 46.99                              | 181.54  |
| TT-10 | 229E | 25.42                             | 1                                | 6.16                         | 27.3                                                | 168.1 | 1.05                         | 32.74                              | 34.50   |
| TT-11 | 229E | 26.88                             | 0                                | 0.88                         | 36.6                                                | 17.7  | 0.10                         | 866.54                             | 89.80   |
| TT-12 | 229E | 27                                | 1                                | 4.19                         | 213.0                                               | 187.7 | 0.92                         | 31.50                              | 28.98   |
| TT-13 | 229E | 27.75                             | 1                                | 1.77                         | 27.4                                                | 114.9 | 2.69                         | 36.47                              | 97.98   |

a: Ct value of HCoV-NL63, HCoV-OC43, and HCoV-229E were determined by in-house qPCR from nasal sample taken at V1. The test to determine HCoV-HKU1 infection (RespiFinder Plus) did not give any value.

b: Serum IgG responder was determined as serum anti-N IgG fold-change  $\geq 1.40$

c: RLU = relative luminescence unit

d: MFI = median fluorescence intensity

**Table S2: Level and dynamics of anti-N antibodies in both serum and NPS samples between serum-IgG-responders and -non-responders.**

| Anti-N antibodies                                         | Non-responder, n = 14 |             | Responder, n = 31 |             | P value <sup>c</sup> |
|-----------------------------------------------------------|-----------------------|-------------|-------------------|-------------|----------------------|
|                                                           | Median                | (IQR)       | Median            | (IQR)       |                      |
| Serum anti-N IgG at V1, x10 <sup>5</sup> RLU <sup>a</sup> | 34                    | (12.5-57.3) | 36                | (18.6-114)  | 0.235                |
| Serum anti-N IgG at V2, x10 <sup>5</sup> RLU <sup>a</sup> | 286                   | (14,6-40,4) | 189               | (126-291)   | <b>&lt;0.0001</b>    |
| Serum anti-N IgG fold-change                              | 0.94                  | (0.83-10.5) | 3.30              | (2.16-1.07) | <b>&lt;0.0001</b>    |
| Nasal anti-N IgA at V1, MFI <sup>b</sup>                  | 186                   | (147-540)   | 55                | (37-84)     | <b>&lt;0.0001</b>    |
| Nasal anti-N IgA at V2, MFI <sup>b</sup>                  | 107                   | (85-193)    | 107               | (57-329)    | 0.875                |
| Nasal anti-N IgA fold-change                              | 0.50                  | (0.21-1.24) | 1.73              | (1.02-5.64) | <b>0.0002</b>        |

a: RLU = relative luminescence unit

b: MFI = median fluorescence intensity

c: P value is determined by Mann-Whitney test. Bold values = significant difference (p < 0.05)

*Table S3: HCoV-matched anti-S-antibody dynamics of the subjects in serum and NPS samples.*

| ID    | HCoV | Serum IgG responder <sup>a</sup> | Fold-change serum anti-S IgG | Serum anti-S IgG, MFI <sup>b</sup> |        | Fold-change nasal anti-S IgA | Nasal anti-S IgA, MFI <sup>b</sup> |        |
|-------|------|----------------------------------|------------------------------|------------------------------------|--------|------------------------------|------------------------------------|--------|
|       |      |                                  |                              | V1                                 | V2     |                              | V1                                 | V2     |
| OC-01 | OC43 | 1                                | 106.49                       | 1059                               | 112775 | 192.41                       | 146                                | 28204  |
| OC-02 | OC43 | 1                                | 233.29                       | 307                                | 71621  | 49.96                        | 672                                | 33616  |
| OC-03 | OC43 | 1                                | 3.40                         | 106                                | 362    | 1.44                         | 96065                              | 138272 |
| OC-04 | OC43 | 1                                | 165.73                       | 622                                | 103170 | 49.40                        | 507                                | 25077  |
| OC-05 | OC43 | 0                                | 42.03                        | 935                                | 39293  | 0.28                         | 711                                | 197    |
| OC-06 | OC43 | 1                                | 2.37                         | 664                                | 1577   | 1.45                         | 50825                              | 73861  |
| OC-07 | OC43 | 0                                | 5.10                         | 1373                               | 7000   | 1.33                         | 4636                               | 6187   |
| OC-08 | OC43 | 1                                | 288.19                       | 526                                | 151733 | 6.23                         | 154                                | 964    |
| OC-09 | OC43 | 0                                | 4.23                         | 84                                 | 355    | 58.12                        | 104                                | 6084   |
| OC-11 | OC43 | 0                                | 9.58                         | 115                                | 1106   | 68.35                        | 1574                               | 107643 |
| OC-12 | OC43 | 1                                | 3.27                         | 351                                | 1148   | 0.59                         | 83312                              | 49563  |
| OC-13 | OC43 | 0                                | 514.42                       | 290                                | 149183 | 2.39                         | 61366                              | 146933 |
| OC-14 | OC43 | 1                                | 2.16                         | 904                                | 1953   | 9.24                         | 5606                               | 51781  |
| HK-01 | HKU1 | 0                                | 0.13                         | 117617                             | 15017  | 0.13                         | 4487                               | 574    |
| HK-02 | HKU1 | 0                                | 0.91                         | 942                                | 861    | 0.13                         | 33083                              | 4261   |
| HK-03 | HKU1 | 1                                | 49.57                        | 344                                | 17053  | 2.60                         | 64                                 | 169    |
| HK-04 | HKU1 | 0                                | 261.57                       | 575                                | 150401 | 33.27                        | 93                                 | 3110   |
| HK-05 | HKU1 | 0                                | 1.53                         | 36                                 | 55     | 0.19                         | 688                                | 131    |
| HK-07 | HKU1 | 0                                | 0.10                         | 14497                              | 1392   | 0.01                         | 127482                             | 1806   |
| HK-08 | HKU1 | 0                                | 18.82                        | 72                                 | 1355   | 86.35                        | 33                                 | 2914   |
| HK-09 | HKU1 | 0                                | 1.39                         | 284                                | 394    | 0.81                         | 388                                | 313    |
| HK-10 | HKU1 | 1                                | 1534.43                      | 37                                 | 56774  | 1.19                         | 56                                 | 67     |
| HK-11 | HKU1 | 0                                | 0.20                         | 144764                             | 29512  | 1.71                         | 280                                | 478    |
| HK-12 | HKU1 | 1                                | 8.22                         | 176                                | 1447   | 6.36                         | 541                                | 3442   |

Table S3 (Continued).

| ID    | HCoV | Serum IgG responder <sup>a</sup> | Fold-change serum anti-S IgG | Serum anti-S IgG, MFI <sup>b</sup> |        | Fold-change nasal anti-S IgA | Nasal anti-S IgA, MFI <sup>b</sup> |       |
|-------|------|----------------------------------|------------------------------|------------------------------------|--------|------------------------------|------------------------------------|-------|
|       |      |                                  |                              | V1                                 | V2     |                              | V1                                 | V2    |
| NL-01 | NL63 | 1                                | 1.38                         | 523                                | 721    | 0.46                         | 1935                               | 888   |
| NL-02 | NL63 | 1                                | 2.32                         | 1010                               | 2344   | 0.98                         | 369                                | 361   |
| NL-03 | NL63 | 1                                | 5.08                         | 117                                | 594    | 2.78                         | 270                                | 750   |
| NL-05 | NL63 | 1                                | 6.81                         | 70                                 | 477    | 5.52                         | 595                                | 3289  |
| NL-06 | NL63 | 1                                | 1.57                         | 149                                | 235    | 3.47                         | 343                                | 1189  |
| NL-07 | NL63 | 1                                | 2.37                         | 71                                 | 169    | 3.94                         | 292                                | 1152  |
| NL-08 | NL63 | 1                                | 1.17                         | 336                                | 392    | 1.51                         | 308                                | 466   |
| NL-09 | NL63 | 1                                | 3.53                         | 208                                | 737    | 6.72                         | 110                                | 744   |
| NL-11 | NL63 | 1                                | 3.47                         | 39                                 | 136    | 40.05                        | 452                                | 18128 |
| TT-01 | 229E | 1                                | 10.08                        | 140                                | 1411   | 6.64                         | 29                                 | 195   |
| TT-02 | 229E | 1                                | 167.28                       | 123                                | 20575  | 23.11                        | 56                                 | 1304  |
| TT-03 | 229E | 1                                | 44.21                        | 1686                               | 74562  | 18.26                        | 418                                | 7646  |
| TT-04 | 229E | 1                                | 261.87                       | 281                                | 73585  | 66.71                        | 85                                 | 5689  |
| TT-05 | 229E | 1                                | 4.08                         | 545                                | 2223   | 4.56                         | 43                                 | 199   |
| TT-06 | 229E | 1                                | 6.67                         | 20785                              | 138652 | 11.30                        | 641                                | 7247  |
| TT-07 | 229E | 1                                | 2.58                         | 347                                | 896    | 1.06                         | 381                                | 404   |
| TT-09 | 229E | 1                                | 19.45                        | 147                                | 2869   | 56.73                        | 148                                | 8412  |
| TT-10 | 229E | 1                                | 4.57                         | 97                                 | 443    | 2.48                         | 31                                 | 79    |
| TT-11 | 229E | 0                                | 3.10                         | 1344                               | 4169   | 0.13                         | 16395                              | 2118  |
| TT-12 | 229E | 1                                | 1.49                         | 138                                | 205    | 1.00                         | 29                                 | 29    |
| TT-13 | 229E | 1                                | 1.62                         | 580                                | 938    | 1.92                         | 226                                | 435   |

a: Serum IgG responder was determined as serum anti-N IgG fold-change  $\geq 1.40$ .

b: MFI = median fluorescence intensity

**Table S4: Level and dynamics of anti-S antibodies in both serum and NPS samples between serum-IgG-responders and -non-responders.**

| Anti-S antibodies                        | Non-responder, n = 14 |              | Responder, n = 31 |              | p value <sup>b</sup> |
|------------------------------------------|-----------------------|--------------|-------------------|--------------|----------------------|
|                                          | median                | (IQR)        | median            | (IQR)        |                      |
| Serum anti-S IgG at V1, MFI <sup>a</sup> | 755                   | (108-4654)   | 307               | (123-580)    | 0.192                |
| Serum anti-S IgG at V2 MFI <sup>a</sup>  | 2781                  | (745-31958)  | 1447              | (477-56774)  | 0.744                |
| Serum anti-S IgG fold-change             | 3.67                  | (0,73-24,62) | 4.57              | (2,37-49,57) | 0.235                |
| Nasal anti-S IgA at V1, MFI <sup>a</sup> | 1143                  | (237-20567)  | 309               | (85-596)     | <b>0.042</b>         |
| Nasal anti-S IgA at V2, MFI <sup>a</sup> | 2516                  | (437-2110)   | 1189              | (405-18128)  | 0.913                |
| Nasal anti-S IgA fold-change             | 1.07                  | (0,13-39,48) | 4.56              | (1,45-18,26) | 0.064                |

a: MFI = median fluorescence intensity.

b: p value determined by Mann-Whitney U test. Significance is defined as  $p < 0.05$

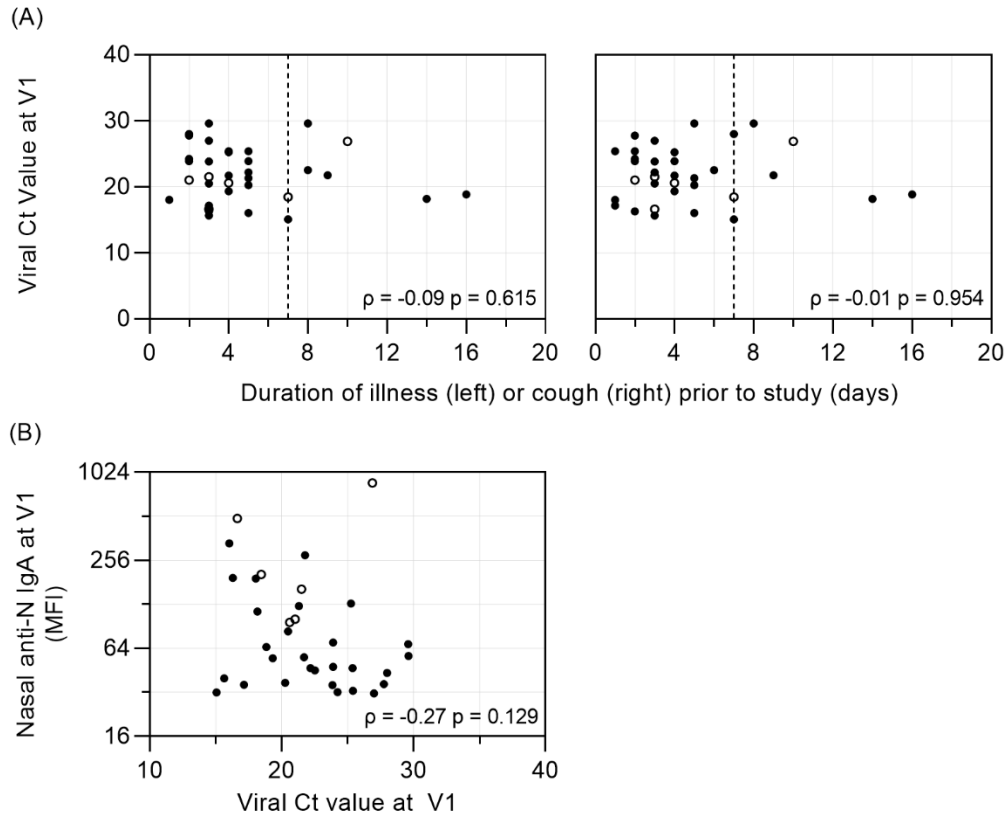

**Figure S1: Possible correlation between viral Ct value at V1 with other variables.** (A) The elapsed days from first illness (left panel) or cough (right panel) to the visit 1(V1) are plotted in x axis (linear scale) against viral Ct value at V1 in y axis (linear scale). Dashed line: duration of illness/cough seven days since first symptom onset. (B) The viral Ct value at V1 presented in x axis is plotted in x axis (linear scale) against the virus-matched nasal anti-N IgA level at V1 in median fluorescence intensity (MFI) in y axis (log 2 scale). Ct values included in this graph is derived from subjects infected by either HCoV-NL63, HCoV-229E, or HCoV-OC43 at V1 (x axis, linear scale) and Black dots: responders. White dots: non-responders. Correlation was evaluated with Spearman's rank correlation test, with  $p < 0.05$  deemed statistically significant.



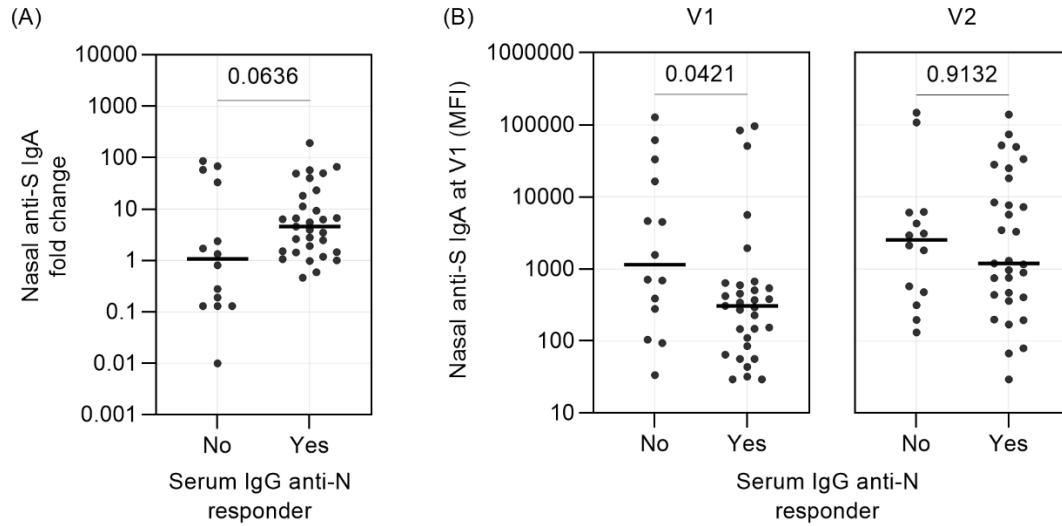

**Figure S2: The level and dynamics of nasal HCoV anti-S IgA between serum IgG non-responders and responders.** (A) The fold-change value of nasal anti-S IgA between responders and non-responders. (B) Nasal anti-S IgA level in median fluorescence unit (MFI) at V1 (left panel) and V2 (right panel), grouped between responders and non-responders. Each dot represents one subject and median of each dataset is denoted as a horizontal solid bar. Value distribution between groups was compared with Mann-Whitney test and significance is defined as  $p < 0.05$ .

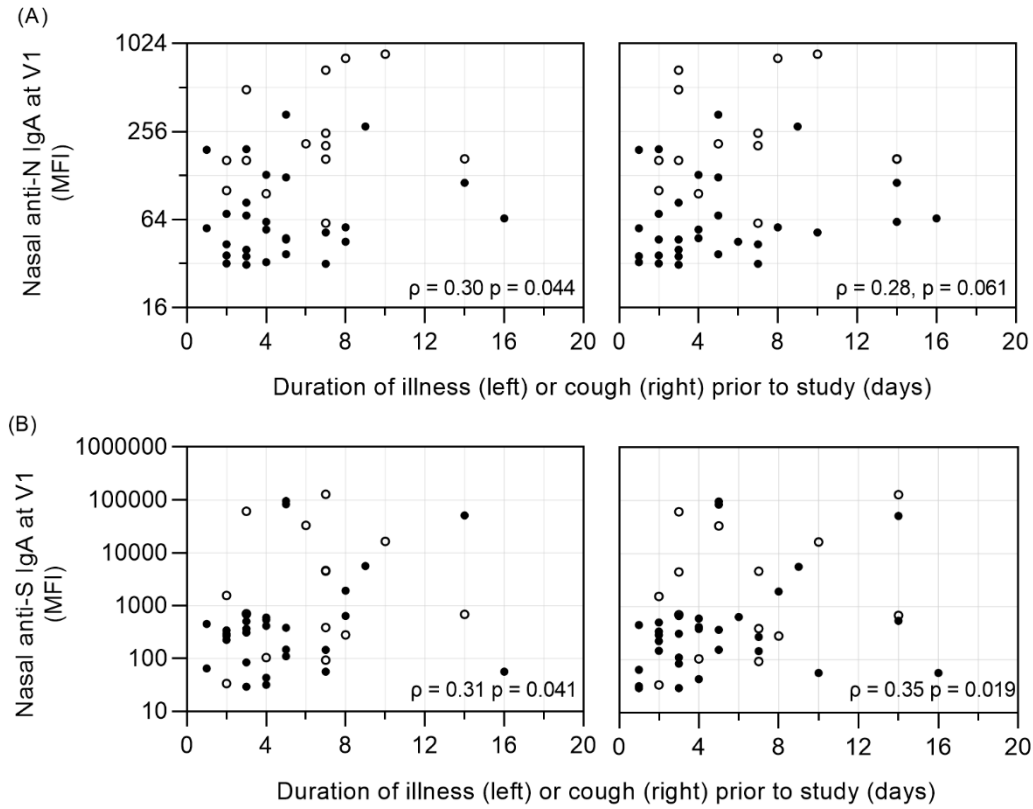

**Figure S3: Correlation between elapsed days from first illness or cough before the start of the study and the nasal anti-N or nasal anti-S IgA value at V1.** The elapsed days from first illness (left panel) or cough (right panel) to the visit 1(V1) are plotted in x axis (linear scale) against nasal anti-N IgA level at V1 (A) or nasal-anti-S IgA level at V1 (B), both in median fluorescence intensity (MFI) in y axis (log 2 scale). White dots: non-responders. Correlation was evaluated with Spearman's rank correlation test, with  $p < 0.05$  deemed statistically significant.

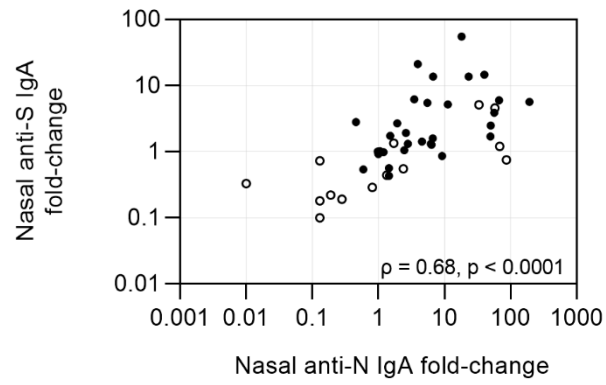

**Figure S4: The correlation between the dynamics of the nasal anti-S and anti-N IgA.** The nasal anti-S IgA fold-change was plotted in x axis (log 10 scale) while the nasal-anti-N IgA fold-change was plotted in y axis (log 10 scale). Black dots: responders. White dots: non-responders. Correlation was evaluated with Spearman's rank correlation test, with  $p < 0.05$  deemed statistically significant.
